# Supplementary material for: Monitoring algorithm of hospitalized patients in a medical center with SARS-CoV-2 (Omicron variant) infection: clinical epidemiological surveillance and immunological assessment
Source: PeerJ. 2023 Jan 23;11:e14666. doi: 10.7717/peerj.14666 (PMC9879147; doi:10.7717/peerj.14666)
Supplement: Data S1 [file peerj-11-14666-s001.xlsx]

## Sheet: Enroll
No.	Confirm date	ct	Varinat	Age	Sex	Medical Hx	1st date	1st brand	2nd date	2nd brand	3rd date	3rd brand	symptoms	onset date	WHO severity classification
1	2022-02-07	32	O BA.1	41	M	Denied	unknown	BNT	unknown	BNT	2022-01-01	BNT	N.A	N.A	Asymptom
2	2022-02-03	15	O BA.1	47	F	Denied	2021-06-27	AZ	2021-10-27	AZ	N.A	N.A	fever, sore throat	2022-02-03	mild
4	2022-02-07	31	O BA.1	46	F	Denied	2021-11-08	BNT	N.A	N.A	N.A	N.A	Cough	2022-02-06	mild
10	2022-02-03	31	BA.2	32	F	Denied	2021-06-19	AZ	2021-09-16	AZ	N.A	N.A	N.A	N.A	Asymptom
12	2022-02-12	15	O BA.1	35	M	Denied	2021-07-29	AZ	2021-11-02	AZ	N.A	N.A	Fever, cough, sore throat, body soreness and diarrhea	2022-02-12	mild
14	2022-02-09	28	O BA.1	42	F	Denied	unknown	BNT	unknown	BNT	N.A	N.A	Cough	2022-02-06	mild
15	2022-02-09	16	O BA.1	44	F	Denied	2021-11-02	CoronaVac	2021-11-23	CoronaVac	N.A	N.A	runny nose, cough	2022-02-08	mild
19	2022-02-07	16	BA.2	27	M	Denied	2021-07-04	BNT	2021-07-30	BNT	2022-01-07	BNT	sore throat	2022-02-06	mild
20	2022-02-04	19	O BA.1	38	M	Denied	2021-07-16	CoronaVac	2021-08-12	CoronaVac	N.A	N.A	Cough, fever, headache	2022-02-04	mild
21	2022-02-08	17	O BA.1	21	M	Denied	2021-09-17	AZ	2021-11-10	AZ	N.A	N.A	Fatigue, Fever	2022-02-08	mild
25	2021-12-29	12	O BA.1	33	F	Denied	2021-05-07	AZ	2021-06-22	BNT	2021-07-23	BNT	N.A	N.A	Asymptom
26	2022-01-02	14	O BA.1	75	F	T2DM	2021-07-02	Moderna	2021-09-22	Moderna	N.A	N.A	cough and sore throat	2022-01-01	mild
27	2022-01-02	12	O BA.1	73	M	Denied	2021-07-02	Moderna	2021-07-31	Moderna	N.A	N.A	stuffy nose, cough	2022-01-02	mild
29	2021-12-29	34	O BA.1	45	M	HBV carrier	2021-09-07	AZ	2021-10-19	AZ	N.A	N.A	N.A	N.A	Asymptom
30	2022-01-02	14	O BA.1	69	M	old CVA	2021-07-20	CoronaVac	2021-08-14	CoronaVac	N.A	N.A	mild chest tightness on 1/2, fever on 1/4	2022-01-02	mild
31	2021-12-20	17	O BA.1	26	M	Denied	2021-07-25	AZ	2021-11-03	AZ	N.A	N.A	N.A	N.A	Asymptom
32	2021-12-24	18	O BA.1	59	F	Denied	2021-07-10	CoronaVac	2021-07-31	CoronaVac	N.A	N.A	N.A	N.A	Asymptom
33	2022-01-04	15	O BA.1	27	M	Denied	2021-10-28	BNT	2021-11-25	BNT	N.A	N.A	sore-throat since 1/1, dry cough and running nose since 1/2, muscle soreness since 1/3	2022-01-01	mild
34	2022-01-03	23	O BA.1	66	F	Denied	2021-07-13	Moderna	2021-09-13	Moderna	N.A	N.A	Cough	2022-01-02	mild
38	2021-12-26	18	O BA.1	49	F	Denied	2021-04-30	BNT	2021-05-21	BNT	N.A	N.A	sore throat and hoarseness	2021-12-25	mild
40	2021-12-31	19	O BA.1	29	F	Denied	2021-04-08	BNT	2021-05-06	BNT	2021-12-22	BNT	N.A	N.A	Asymptom
41	2022-12-19	16	O BA.1	45	M	Denied	2021-04-30	BNT	2021-05-21	BNT	N.A	N.A	Mild throat tightness	2021-12-18	mild
43	2022-01-01	14	O BA.1	65	M	Denied	2021-11-19	BNT	2021-12-17	BNT	N.A	N.A	N.A	N.A	Asymptom
44	2021-12-28	26	O BA.1	27	F	Denied	2021-10-19	Moderna	2021-11-16	Moderna	N.A	N.A	mild productive cough	2021-12-27	mild
46	2021-12-18	18	O BA.1	18	F	Denied	unknown	AZ	2021-07-20	BNT	2021-08-20	BNT	Productive cough and sore throat	2021-12-19	mild
47	2021-12-19	30	O BA.1	44	F	Denied	2021-05-06	AZ	2021-07-09	AZ	2021-12-17	BNT	Cough	2021-12-20	mild
48	2022-01-04	13	BA.2	54	M	Denied	2021-07-19	BNT	2021-08-09	BNT	2021-12-27	BNT	mild headache and dry cough since 1/4 morning	2022-01-02	mild
49	2021-12-24	20	O BA.1	30	M	Denied	2021-08-17	Moderna	2021-09-22	Moderna	N.A	N.A	N.A	N.A	Asymptom
50	2021-12-28	16	O BA.1	52	F	Breast CA	2021-06-03	AZ	2021-10-09	AZ	N.A	N.A	Productive cough	2021-12-25	mild
51	2021-12-20	14	O BA.1	20	M	Denied	2021-07-06	BNT	2021-07-27	BNT	N.A	N.A	N.A	N.A	Asymptom
53	2021-12-31	18	O BA.1	39	M	Denied	2021-05-26	BNT	2021-07-19	BNT	N.A	N.A	N.A	N.A	Asymptom
55	2022-01-26	19	O BA.1	49	M	HIV under treatment	2021-04-08	BNT	2021-09-06	BNT	N.A	N.A	fever, sore throat, productive cough	2022-01-25	mild
56	2022-01-15	25	BA.2	45	M	Denied	2021-11-21	AZ (COVISHIELD)	2022-01-06	AZ (COVISHIELD)	N.A	N.A	N.A	N.A	Asymptom
59	2022-01-28	33	O BA.1	35	M	previous COVID-19 infection in 2021/12	2021-09-08	AZ	2021-10-19	Moderna	2021-11-29	Moderna	N.A	N.A	Asymptom
61	2022-01-17	18	O BA.1	36	M	Denied	2021-05-15	BNT	2021-07-14	BNT	N.A	N.A	Sore throat	2022-01-17	mild
63	2022-01-27	14	BA.2	39	M	Denied	2021-07-19	Sinopharm	N.A	N.A	N.A	N.A	fever, headache, general weakness, pneumonia	2022-01-26	moderate
65	2022-01-27	16	O BA.1	28	M	Denied	2021/07	AZ	2021/10	AZ	N.A	N.A	N.A	N.A	Asymptom
66	2022-01-11	17	O BA.1	55	M	Denied	2021-05-10	AZ	2021-07-12	AZ	2021-12-01	BNT	mild shortness of breath	2022-01-10	mild
70	2022-01-22	24	O BA.1	29	F	Denied	2021-09-26	BNT	2021-10-27	BNT	N.A	N.A	N.A	N.A	Asymptom
72	2022-01-21	18	BA.2	16	F	Denied	2021-07-06	BNT	2021-08-03	BNT	N.A	N.A	N.A	N.A	Asymptom
78	2022-01-21	20	O BA.1	30	F	Pregnancy 17 1/7 week	2022-01-13	Moderna	N.A	N.A	N.A	N.A	runny nose	2022-01-21	mild
79	2022-01-21	28	BA.2	52	M	Denied	2021-05-05	AZ	2021-07-20	AZ	2022-01-05	Moderna	N.A	N.A	Asymptom
80	2022-01-25	20	O BA.1	21	M	Denied	2021-07-09	Moderna	2021-10-28	Moderna	N.A	N.A	fever, productive cough, body soreness	2022-01-25	mild
83	2022-01-21	13	BA.2	12	F	Denied	2021-08-28	BNT	2021-09-25	BNT	N.A	N.A	fever, runny nose, sore throat	2022-01-19	mild
84	2022-01-28	30	O BA.1	53	M	Denied	2021-07-22	AZ	2021-10-11	AZ	N.A	N.A	N.A	N.A	Asymptom
87	2022-01-07	14	O BA.1	25	F	Denied	2021-08-10	BNT	2021-08-31	BNT	N.A	N.A	coughing with nasal congestion	2022-01-07	mild
88	2022-01-13	29	O BA.1	27	M	previous COVID-19 infection in 2022/01 in US	2021-10-14	J&J	N.A.	N.A.	N.A	N.A	N.A	N.A	Asymptom
89	2022-01-13	24	O BA.1	29	M	Denied	2021-10-23	BNT	2021-11-13	BNT	N.A	N.A	N.A	N.A	Asymptom
92	2022-01-10	22	BA.2	25	F	Hyperthyroidism, MVP, Thalassemia, G6PD	2021-10-20	BNT	2021-12-12	BNT	N.A	N.A	Dry cough and abnormal taste was also noted(喝水變甜)	2022-01-10	mild
93	2022-01-14	25	O BA.1	24	F	previous COVID-19 infection in 2021/12 in US	2021-10-15	BNT	2021-11-05	BNT	N.A	N.A	N.A	N.A	Asymptom
95	2022-01-11	23	O BA.1	37	F	Denied	2021-04-19	BNT	2021-05-10	BNT	2022-01-08	BNT	Dry cough	2022-01-11	mild
96	2022-01-06	14	O BA.1	21	F	Denied	2021/7	AZ	2021/9	BNT	N.A	N.A	Coughing, headache and runny nose	2022-01-07	mild
99	2022-01-06	27	O BA.1	60	M	Denied	2021-07-20	AZ	2021-10-12	AZ	2021-12-21	Moderna	N.A	N.A	Asymptom
101	2022-01-09	14	O BA.1	24	M	ankylosis spondylosis	2021-04-05	BNT	2021-04-26	BNT	2021-12-23	BNT	sore throat, coughing and runny nose	2022-01-08	mild
102	2022-01-10	12	O BA.1	29	M	Denied	2021-07-12	Moderna	2021-11-02	Moderna	N.A	N.A	N.A	N.A	Asymptom
103	2022-01-13	16	BA.2	50	F	HTN	2021-05-10	AZ	2021-07-19	AZ	2021-12-13	BNT	Cough and headache	2022-01-15	mild
105	2022-01-10	13	O BA.1	42	M	Denied	2021-06-18	AZ	2021-09-14	Moderna	N.A	N.A	mild throat discomfort	2022-01-10	mild
106	2022-01-05	25	O BA.1	23	F	Denied	2021-07-16	AZ	2021-09-04	BNT	N.A	N.A	N.A	N.A	Asymptom
108	2022-01-05	15	O BA.1	34	M	Denied	2021-07-02	AZ	2021-09-06	BNT	N.A	N.A	mild coughing with sputum	2022-01-04	mild
109	2022-01-05	24	O BA.1	23	M	Denied	2021-07-24	AZ	2021-09-04	BNT	N.A	N.A	N.A	N.A	Asymptom
110	2022-01-06	13	O BA.1	59	F	Denied	2021-06-03	BNT	2021-06-30	BNT	2021-11-16	Moderna	mild mild cough and running nose, dry throat	2022-01-05	mild
111	2022-01-05	30	O BA.1	27	M	Denied	2021-08-12	AZ	2021-11-05	AZ	N.A	N.A	productive cough	2022-01-06	mild
118	2022-02-12	15	O BA.1	47	F	Denied	2021-07-30	AZ	2021-11-03	AZ	N.A	N.A	fever	2022-02-11	mild
119	2022-02-16	22	BA.2	21	M	Denied	2021-09-28	BNT	2021-11-10	BNT	N.A	N.A	headache and fever since 2/15 sore throat since 2/16	2022-02-15	mild
120	2022-02-18	31	O BA.1	28	M	previous COVID-19 infection on 2022/1/3	2020-12-23	BNT	2021-01-28	BNT	2021-12-12	BNT	N.A	N.A	Asymptom
121	2022-02-20	31	O BA.1	63	F	previous COVID-19 infection on 2021/12/27	2021-07-27	AZ	2021-10-19	AZ	N.A	N.A	N.A	N.A	Asymptom
122	2022-02-18	31	O BA.1	29	F	previous COVID-19 infection on 2022/1/3	2021-01-05	BNT	2021-01-28	BNT	2021-12-13	BNT	N.A	N.A	Asymptom
123	2022-02-18	13	O BA.1	29	M	Living donor of kidney	2021-09-21	Moderna	2021-10-21	Moderna	N.A	N.A	mild sore throat	2022-02-19	mild
125	2022-02-19	16	BA.2	29	M	Denied	2021-06-09	BNT	2021-07-05	BNT	2022-01-25	BNT	N.A	N.A	Asymptom
127	2022-02-19	13	BA.2	67	M	Denied	unknown	AZ	unknown	AZ	2022-01-03	AZ	cough and runny nose	2022-02-15	mild
128	2022-02-20	22	O BA.1	69	F	Denied	unknown	BNT	unknown	BNT	2021-12-01	Moderna	N.A	N.A	Asymptom
130	2022-02-18	13	O BA.1	36	M	Denied	2021-09-09	AZ	2021-11-18	AZ	N.A	N.A	productive cough, runny nose, sore throat and fever	2022-02-17	mild
138	2022-02-21	12	O BA.1	35	F	Denied	2021-10-27	BNT	2021-11-29	BNT	N.A	N.A	sneezing	2022-02-20	mild
139	2022-02-20	13	O BA.1	32	F	Denied	2021-07-10	BNT	2021-07-31	BNT	2022-02-09	BNT	Cough, sore throat	2022-02-20	mild
143	2022-02-24	30	BA.2	44	M	previous COVID-19 infection on 2021/11	2021-06-21	AZ	2021-08-23	AZ	N.A	N.A	N.A	N.A	Asymptom
146	2022-02-26	18	BA.2	33	M	Denied	2021/06/	AZ	2021-09-01	AZ	N.A	N.A	nasal congestion	2022-02-26	mild
147	2022-02-27	15	O BA.1	24	M	Denied	unknown	BNT	unknown	BNT	2022-01-23	Moderna	mild cough	2022-02-20	mild
149	2022-03-03	16	O BA.1	32	F	Denied	2021-09-08	AZ	2021-11-10	AZ	N.A	N.A	chillness, SOB, productive cough	2022-03-01	mild
150	2022-03-03	23	O BA.1	35	M	Denied	2021-07-22	AZ	2021-10-08	AZ	2021/12/	Moderna	N.A	N.A	Asymptom
151	2022-03-03	21	O BA.1	26	F	Denied	unknown	AZ	unknown	Moderna	2021-12-01	Moderna	muscle soreness	2022-02-28	mild
152	2022-03-03	16	O BA.1	29	F	Denied	unknown	BNT	unknown	BNT	N.A	N.A	Cough, sore throat	2022-03-02	mild
157	2022-03-01	30	O BA.1	64	F	previous COVID-19 infection on 2022/01/13 at US	unknown	BNT	unknown	BNT	2021-12-01	BNT	Mild coughing with stuffy nose	2022-02-28	mild
158	2022-03-02	27	BA.2	53	F	Denied	2021-07-07	AZ	2021-11-08	AZ	2022-01-14	Moderna	N.A	N.A	Asymptom
160	2022-03-02	31	BA.2	19	M	previous COVID-19 infection on 2022/02	unknown	unknown	unknown	unknown	N.A	N.A	N.A	N.A	Asymptom
164	2022-03-10	19	BA.2	61	M	Denied	2021-07-30	AZ	2021-09-06	BNT	2022-01-20	BNT	N.A	N.A	Asymptom
166	2022-03-11	19	BA.2	48	F	Denied	2021-10-27	BNT	2021-11-26	BNT	N.A	N.A	rhinorrhea	2022-03-10	mild
167	2022-03-11	15	BA.2	38	M	Denied	unknown	BNT	unknown	BNT	2021-12-01	Moderna	nasal congestion, runny nose, throat itchiness	2022-03-10	mild
168	2022-03-13	17	BA.2	18	F	Denied	unknown	AZ	unknown	AZ	2022-03-06	Moderna	Cough and throat itchiness	2022-03-12	mild
169	2022-03-06	13	BA.2	20	F	Denied	unknown	unknown	unknown	unknown	N.A	N.A	Fever, cough, body soreness and general weakness	2022-03-06	mild
172	2022-03-13	18	BA.2	31	M	Denied	2021-08-06	BNT	2021-08-27	BNT	2022-02-13	Moderna	productive cough, sore throat and fever	2022-03-13	mild
173	2022-03-21	12	BA.2	23	M	Denied	unknonwn	AZ	unknonwn	AZ	2022-01-22	AZ	sore throat, productive cough and dizziness	2022-03-21	mild
174	2022-03-15	15	BA.2	30	M	IBD	2021-10-26	BNT	2021-11-27	BNT	N.A	N.A	N.A	N.A	Asymptom
175	2022-03-16	17	BA.2	19	F	Denied	2021-10-25	AZ	2021-12-04	AZ	N.A	N.A	unny nose, stuffy nose, cough, sore throat and fever	2022-03-15	mild
176	2022-03-19	15	BA.2	59	M	HTN, arrythmia and suspected CAD	unknonwn	AZ	unknonwn	AZ	2022-01-17	BNT	headache and productive cough	2022-03-18	mild
177	2022-03-21	15	BA.2	21	M	Denied	unknonwn	BNT	2021-12-22	BNT	N.A	N.A	fever, muscle soreness	2022-03-21	mild
178	2022-03-15	14	BA.2	19	M	Denied	2021-11-15	AZ	2021-12-15	AZ	N.A	N.A	fever, cough, mild runny nose	2022-03-14	mild
179	2022-03-25	14	BA.2	30	M	Denied	2021-10-24	BNT	2021-11-26	BNT	2022-02-12	BNT	fever	2022-03-26	mild
180	2022-03-24	14	BA.2	59	F	Denied	unknonwn	unknonwn	unknonwn	unknonwn	unknonwn	unknown	sore throat	2022-03-23	mild
181	2022-03-23	17	BA.2	25	M	previous COVID-19 infection in 2021/11	unknonwn	CoronaVac	unknonwn	CoronaVac	N.A	N.A	cough	2022-03-23	mild
182	2022-03-22	31	BA.2	61	M	previous COVID-19 infection on 3/5	2021/10/	BNT	2021-11-01	BNT	N.A	N.A	N.A	N.A	Asymptom
183	2022-03-27	16	BA.2	45	M	previous COVID-19 infection in 2021/5, hyperthyrodisim	2021-07-19	CoronaVac	2021-08-09	CoronaVac	2021-11-30	BNT	sore throat and cough	2022-03-26	mild
184	2022-03-27	16	BA.2	20	F	Denied	unknonwn	BNT	2021-12-29	BNT	N.A	N.A	fever and productive cough	2022-03-27	mild
185	2022-03-27	12	BA.2	27	M	Denied	unknonwn	unknonwn	2021/12/	unknown	N.A	N.A	sore throat and general weakness, fever	2022-03-27	mild
186	2022-03-27	26	BA.2	18	F	Denied	2021-10-08	Sinopharm	2021-11-01	Sinopharm	2021-12-22	BNT	N.A	N.A	Asymptom
187	2022-03-26	15	BA.2	66	F	hypothyroidism	2021-07-15	Moderna	2021-08-13	Moderna	N.A	N.A	productive cough and fever noted on 3/27	2022-03-26	mild
188	2022-03-26	16	BA.2	68	M	OSA	2021-07-05	Moderna	2021-08-13	Moderna	N.A	N.A	productive cough and fever noted on 3/27	2022-03-26	mild
189	2022-03-29	18	BA.2	28	F	Denied	2021-07-30	AZ	2021-10-08	AZ	2022-01-11	BNT	Fever, sore throat, general weakness, cough	2022-03-29	mild
190	2022-03-31	16	BA.2	24	F	Denied	2021-05-17	AZ	2021-07-27	AZ	2022-01-13	Moderna	fever, cough	2022-03-30	mild
191	2022-03-31	18	BA.2	23	M	Denied	unknonwn	AZ	2021-11-11	AZ	N.A	N.A	fever, cough	2022-03-29	mild
192	2022-04-05	14	O BA.1	16	F	Denied	unknonwn	BNT	2022?	BNT	N.A	N.A	sore throat	2022-04-02	mild
194	2022-04-02	16	O BA.1	85	F	Denied	2021-06-18	AZ	2021-09-17	AZ	unknonwn	Moderna	N.A	N.A	Asymptom
195	2022-04-02	29	BA.2	30	M	Denied	2021-09-01	CoronaVac	2021-09-29	AZ	N.A	N.A	N.A	N.A	Asymptom
196	2022-04-02	15	O BA.1	27	F	Denied	2021-10-02	BNT	2021-12-01	BNT	N.A	N.A	cough, runny nose and sore throat	2022-04-01	mild
197	2022-04-01	11	BA.2	49	M	Denied	unknonwn	AZ	unknonwn	AZ	2022/2/	BNT	Fever, general soreness and back soreness	2022-04-01	mild
199	2022-04-05	15	O BA.1	35	F	Denied	2021-06-13	AZ	2021-08-26	Moderna	N.A	N.A	sore throat, stuffing nose	2022-04-04	mild
200	2022-04-03	23	O BA.1	72	F	T2DM	2021-07-08	Moderna	2021-10-15	Moderna	2022-01-14	Moderna	sore throat	2022-03-31	mild
201	2022-04-03	21	O BA.1	50	F	Denied	2021-07-20	AZ	2021-10-12	AZ	2022-01-11	Moderna	cough and sore throat	2022-03-31	mild
202	2022-04-04	14	BA.2	22	M	Denied	2022-01-10	Moderna	2022-02-15	BNT	N.A	N.A	fever and cough	2022-04-03	mild
203	2022-04-05	14	BA.2	42	F	hyperthyroidism	unknonwn	Moderna	2022-01-21	Moderna	N.A	N.A	sore throat and fever on 4/5	2022-04-03	mild
205	2022-04-06	15	BA.2	31	F	Denied	2021-10-25	BNT	2021-12-06	BNT	2022-03-03	Moderna	sore throat	2022-04-01	mild
206	2022-04-06	21	BA.2	59	M	lung CA	unknonwn	BNT	N.A	N.A	N.A	N.A	runny nose and sore throat	2022-04-01	mild
207	2022-04-03	13	BA.2	55	F	Denied	unknonwn	AZ	unknonwn	AZ	2022-01-20	BNT	N.A	N.A	Asymptom
208	2022-03-31	21	BA.2	50	F	Denied	2021-07-23	AZ	2021-11-05	AZ	N.A	N.A	fever, diarrhea, cough and sore throat	2022-03-28	mild
210	2022-04-04	13	BA.2	51	F	Denied	unknonwn	AZ	2022-03-07	AZ	N.A	N.A	fever and cough	2022-04-03	mild
211	2022-04-06	15	BA.2	55	M	Asthma	unknonwn	BNT	2022-02-21	BNT	N.A	N.A	cough, runny nose and sore throat	2022-04-05	mild
214	2022-04-06	18	BA.2	51	M	Denied	unknonwn	AZ	2022-01-20	AZ	2022-01-29	Moderna	Fever, sore throat and coughing	2022-04-03	moderate
215	2022-04-06	21	BA.2	37	M	Denied	2021-10-22	BNT	N.A	N.A	N.A	N.A	fever with general weakness and productive cough	2022-04-06	mild
216	2022-04-06	14	BA.2	47	F	Sicca syndrome	unknonwn	AZ	unknonwn	AZ	unknonwn	Moderna	running nose and sore throat	2022-04-06	mild
218	2022-04-08	14	BA.2	38	F	Denied	2021/11/	BNT	2021-12-13	BNT	N.A	N.A	sore throat and runny nose	2022-04-05	mild
219	2022-04-08	15	BA.2	30	M	Denied	unknonwn	unknonwn	unknonwn	unknonwn	2022-03-04	Moderna	fever with productive cough and pneumonia	2022-04-05	moderate
221	2022-04-12	19	BA.2	9	F	Denied	N.A	N.A	N.A	N.A	N.A	N.A	fever, headache and weakness	2022-04-11	mild
222	2022-04-07	24	BA.2	54	M	T2DM	unknonwn	MVC	unknonwn	MVC	2022-01-24	MVC	cough and mild fever	2022-04-06	mild
223	2022-04-09	16	BA.2	57	F	ITP	unknonwn	unknonwn	unknonwn	unknonwn	2021-12-26	Moderna	sore throat and cough	2022-04-05	mild
224	2022-04-08	19	BA.2	32	M	Denied	2021-11-05	BNT	2022-03-07	BNT	N.A	N.A	sore throat and fever	2022-04-07	mild
225	2022-04-07	21	BA.2	63	F	HTN	2021-12-10	MVC	2022-02-16	MVC	N.A	N.A	runny nose and cough	2022-04-06	mild
226	2022-04-08	17	O BA.1	47	M	Denied	2021-10-07	BNT	2021-11-29	BNT	N.A	N.A	runny nose	2022-04-07	mild
227	2022-04-07	29	BA.2	42	M	Denied	2021-08-03	AZ	2021-11-02	AZ	2022-02-09	BNT	runny nose and cough	2022-04-05	mild
228	2022-04-06	17	BA.2	13	F	Denied	unknonwn	BNT	unknonwn	BNT	N.A	N.A	runny nose and cough	2022-04-06	mild
229	2022-04-07	27	BA.2	6	F	Denied	N.A	N.A	N.A	N.A	N.A	N.A	Productive cough and fever	2022-04-07	mild
230	2022-04-12	16	BA.2	31	M	Denied	N.A	N.A	N.A	N.A	N.A	N.A	general weakness on 4/8 and fever developed since 4/11	2022-04-08	mild
231	2022-04-12	15	BA.2	73	F	HTN	2021-07-03	Moderna	2021-10-07	Moderna	2022-02-16	Moderna	fever and productive cough	2022-04-11	mild
232	2022-04-13	19	BA.2	29	F	Denied	2021-11-30	BNT	N.A	N.A	N.A	N.A	fever, cough and vomit	2022-04-12	mild
233	2022-04-13	14	BA.2	85	M	HTN	unknonwn	AZ	unknonwn	AZ	2021/12/	Moderna	fever, cough and running nose	2022-04-11	mild
234	2022-04-11	23	BA.2	8	F	Denied	N.A	N.A	N.A	N.A	N.A	N.A	mild fever	2022-04-10	mild
235	2022-04-18	32	BA.2	26	F	Denied	2021-05-27	AZ	2021-08-24	Moderna	2022-01-18	Moderna	sore throat on 4/16, fever on 4/18	2022-04-16	mild
236	2022-04-18	15	BA.2	62	M	T2DM, OHCA, suspect CAD	unknonwn	AZ	unknonwn	AZ	unknonwn	Moderna	N.A	N.A	Asymptom
237	2022-04-16	35	BA.2	3	F	PSVT	N.A	N.A	N.A	N.A	N.A	N.A	fever, cough, nausea and vomiting	2022-04-15	mild
238	2022-04-16	18	BA.2	81	M	HTN, asthma	N.A	N.A	N.A	N.A	N.A	N.A	chillness and productive cough	2022-04-15	mild
239	2022-04-17	19	BA.2	52	M	T2DM	unknonwn	AZ	unknonwn	AZ	2022/02/	BNT	fever and sore throat	2022-04-16	mild
240	2022-04-16	15	BA.2	74	F	Denied	N.A	N.A	N.A	N.A	N.A	N.A	mild fatigue and runny nose	2022-04-15	mild
242	2022-04-14	19	BA.2	65	F	T2DM, asthma	2021-04-30	BNT	2021-06-26	Moderna	2021-12-13	Moderna	Chest tightness, cough, dyspnea on exertion and headache	2022-04-11	moderate
243	2022-04-14	19	BA.2	25	F	Denied	2022-02-14	BNT	N.A	N.A	N.A	N.A	fever, running nose and cough	2022-04-12	mild
244	2022-04-14	14	BA.2	18	F	Hyperthyrodism	unknown	BNT	2021-12-17	BNT	N.A	N.A	fever, cough and running nose	2022-04-14	mild
245	2022-04-19	21	BA.2	93	M	HTN	2021-06-18	AZ	2021-09-17	AZ	2022-01-19	Moderna	fever, SOB	2022-04-19	mild
246	2022-04-19	15	BA.2	46	M	TIA	2021-11-09	BNT	2022-01-04	BNT	N.A	N.A	cough	2022-04-18	mild
247	2022-04-21	31	BA.2	25	F	Hyperthyrodism	2021-06-03	AZ	2021-08-18	Moderna	2022-01-17	Moderna	sore throat on 4/18,	2022-04-18	mild
248	2022-04-24	13	BA.2	9	M	Denied	N.A	N.A	N.A	N.A	N.A	N.A	fever, abdominal pain, headache, nausea and cough	2022-04-23	mild
249	2022-04-17	19	BA.2	33	F	asthma		Corovac		Corovac	2022-02-06	BNT	sore throat, runny nose, stuffy nose, and coughing	2022-04-18	mild
250	2022-04-25	21	BA.2	25	M	Denied	2021-06-17	AZ	2021-07-21	AZ	2022-01-03	Moderna	productive cough	2022-04-26	mild
251	2022-04-24	31	BA.2	62	F	LDLT with HAT	unknown	unknown	unknown	unknown	unknown	unknown	respiratory failure with ventilator support	2022-04-25	severe
252	2022-04-25	14	BA.2	38	F	Denied	unknown	unknown	unknown	unknown	unknown	unknown	fever, sore throat, and runny nose	2022-04-24	mild
253	2022-04-23	34	BA.2	37	F	Denied	unknown	unknown	unknown	unknown	N.A	N.A	dry cough, runny nose, and headache	2022-04-23	mild
254	2022-04-22	15	BA.2	11	M	Denied	N.A	N.A	N.A	N.A	N.A	N.A	Fever and cough since this morning with mild poor activity and headache	2022-04-23	moderate
255	2022-04-24	17	BA.2	11	F	Diffuse large B-cell lymphoma	N.A	N.A	N.A	N.A	N.A	N.A	Intermittent fever, productive cough, runny nose and mild sore throat	2022-04-23	mild
256	2022-04-24	16	BA.2	85	F	DM, primary TB	unknown	unknown	unknown	unknown	unknown	unknown	N.A	N.A	Asymptom
257	2022-04-24	23	BA.2	39	F	Denied	unknown	AZ	unknown	AZ	unknown	Moderna	Headache and runny nose	2022-04-25	mild
258	2022-04-24	14	BA.2	71	M	T2DM	unknown	unknown	unknown	unknown	unknown	unknown	desaturation	2022-04-25	mild
259	2022-04-24	13	BA.2	42	F	Denied	unknown	BNT	unknown	moderna	N.A	N.A	runny nose and dry cough	2022-04-24	mild
260	2022-04-25	16	BA.2	25	M	Denied	2021-05-26	AZ	2021-08-06	AZ	2022-01-07	Moderna	sore throat, runny nose, and dry cough	2022-04-23	mild
261	2022-04-23	15	BA.2	22	F	Denied	unknown	AZ	unknown	AZ	2022/01/	Moderna	cough, sore throat and fever	2022-04-20	mild
264	2022-04-23	16	BA.2	81	F	previous diagosis in 2021/01	unknown	BNT	unknown	BNT	unknown	BNT	back and headache	2022-04-23	mild
265	2022-04-23	18	BA.2	9	M	Denied	N.A	N.A	N.A	N.A	N.A	N.A	intermittent fever and pneumonia was noted after admission	2022-04-22	moderate
266	2022-04-25	12	BA.2	61	F	T2DM under HD, CAD	2021-06-18	AZ	2021-09-17	AZ	2022-01-21	BNT	fever, general weakness and cough	2022-04-22	mild
267	2022-04-21	19	BA.2	37	M	HTN	2021-09-03	AZ	2021-11-12	AZ	2022-02-15	BNT	N.A	N.A	Asymptom
268	2022-04-22	16	BA.2	23	F	Denied	2021-06-19	moderna	2021-07-16	moderna	2022-01-20	moderna	Mild sore throat and productive cough	2022-04-21	mild
269	2022-04-24	33	BA.2	51	M	CAD and HF	unknown	unknown	N.A	N.A	N.A	N.A	N.A	N.A	Asymptom
270	2022-04-25	19	BA.2	92	M	COPD, DM, HCVD, old SAH	N.A	N.A	N.A	N.A	N.A	N.A	fever	2022-04-25	moderate
271	2022-04-23	24	BA.2	71	F	Denied	2021-07-10	moderna	2021-10-04	moderna	2022-01-19	moderna	cough and sore throat	2022-04-24	mild
272	2022-04-23	19	BA.2	74	M	HTN	N.A	N.A	N.A	N.A	N.A	N.A	fever	2022-04-22	mild
273	2022-04-23	15	BA.2	23	F	Denied	2021-05-26	AZ	2021-08-09	AZ	2022-01-11	moderna	sore throat and mild fever	2022-04-22	mild
274	2022-04-25	28	BA.2	38	M	HTN	unknown	moderna	unknown	moderna	unknown	BNT	N.A	N.A	Asymptom
276	2022-04-20	19	BA.2	5	F	Denied	N.A	N.A	N.A	N.A	N.A	N.A	fever, cough and runny nose	2022-04-20	mild
277	2022-04-22	21	BA.2	2	F	Denied	N.A	N.A	N.A	N.A	N.A	N.A	Fever and runny nose	2022-04-22	mild
278	2022-04-24	16	BA.2	41	F	Hyperthyroidism, ASD	2021-06-04	AZ	2021-08-08	AZ	2022-01-14	moderna	Cough, runny nose, sore throat	2022-04-18	mild
279	2022-04-21	26	BA.2	74	M	HTN, T2DM	2021-07-03	moderna	2021-10-04	moderna	2022-01-27	moderna	diarrhea, productive cough	2022-04-20	mild
280	2022-04-22	15	BA.2	70	F	Denied	2021-07-08	moderna	2021-10-04	moderna	2022-01-28	moderna	sore throat cough	2022-04-19	mild
281	2022-04-22	16	BA.2	39	M	Denied	2021-05-17	AZ	2021-08-02	AZ	2022-01-22	BNT	cough and headache	2022-04-23	mild
282	2022-04-23	14	BA.2	70	F	Colon CA	2021-10-28	moderna	2021-12-01	moderna	unknown	moderna	nasal congestion, sore throat, headache	2022-04-23	mild
283	2022-04-25	25	BA.2	42	F	pregnancy 38+1wks	N.A	N.A	N.A	N.A	N.A	N.A	N.A	N.A	Asymptom
284	2022-04-23	17	BA.2	80	F	HTN,CVD	2021-06-20	AZ	2021-09-26	moderna	2022-01-08	moderna	sore throat and productive coug	2022-04-21	mild
285	2022-04-28	12	BA.2	78	F	Sicca syndrome, gastric cancer, chronic SDH, HCVD	?	?	?	?	?	?	desaturation on 4/28	2022-04-28	moderate
286	2022-04-28	34	BA.2	77	F	CAD, stroke. VHD	?	?	?	?	?	N.A	fever	2022-04-27	mild
287	2022-04-26	22	BA.2	64	M	ADCC of lung and colon	?	?	?	?	?	?	N.A	N.A	Asymptom
288	2022-04-30	14	BA.2	50	F	Denied	2021-07-30	moderna	2021-10-27	moderna	2022-01-25	moderna	runny nose and sore throat	2022-04-28	mild
289	2022-04-27	22	BA.2	89	M	NTMP	N.A	N.A	N.A	N.A	N.A	N.A	fever and general weakness	2022-04-27	moderate
290	2022-05-02	22	BA.2	25	F	Denied	2021-05-17	AZ	2021-07-27	AZ	2021-12-30	moderna	sore throat, cough and fever	2022-05-01	mild
291	2022-05-02	21	BA.2	48	F	Denied	N.A	N.A	N.A	N.A	N.A	N.A	N.A	N.A	Asymptom
292	2022-05-01	11	BA.2	77	M	CAD, HCVD, T2DM, HTN	2022-04-25	moderna	N.A	N.A	N.A	N.A	N.A	N.A	Asymptom
293	2022-04-30	26	BA.2	62	F	sjogren syndrome	?	?	?	?	N.A	N.A	sore throat	2022-04-30	mild
294	2022-04-30	12	BA.2	76	F	T2DM, parkinson's	N.A	N.A	N.A	N.A	N.A	N.A	fever, cough and general weakness	2022-04-28	moderate
295	2022-05-02	14	BA.2	62	M	CAD, T2DM, HTN, old stroke	?	moderna	?	moderna	N.A	N.A	drycough and dyspnea	2022-05-01	mild
296	2022-05-04	22	BA.2	66	M	HTN, old SAH	?	?	?	?	?	N.A	fever and mild sore throat	2022-05-04	mild
297	2022-05-04	13	BA.2	91	M	COPD,	?	?	?	?	?	N.A	SOB	2022-05-04	mild
298	2022-05-03	26	BA.2	67	F	ESRD	?	AZ	??	AZ	?	moderna	fever, vomiting, diarrhea	2022-05-03	mild
299	2022-05-05	12	BA.2	87	F	T2DM, HTN, AF	2021-06-21	AZ	2021-09-22	AZ	2022-04-13	moderna	fever and conscious disturbance	2022-05-05	mild
300	2022-05-02	19	BA.2	29	F	Denied	2021-05-26	AZ	2021-08-06	AZ	2022-01-07	moderna	sore throat	2022-05-01	mild
301	2022-05-02	16	BA.2	86	F	T2DM, ESRD	2021-07-30	moderna	2021-10-27	moderna	2022-01-25	moderna	N.A	N.A	Asymptom
302	2022-05-04	13	BA.2	92	F	HCVD	?	?	?	?	?	N.A	fever	2022-05-03	moderate
303	2022-05-04	19	BA.2	37	F	Denied	2021-09-08	AZ	2021-11-18	AZ	2022-02-14	BNT	URI symptom	2022-05-03	mild
304	2022-05-04	22	BA.2	35	F	pregnancy 17wk	2021-05-29	AZ	2021-08-01	moderna	2022-01-14	moderna	sore throat	2022-05-03	mild
305	2022-05-04	17	BA.2	40	M	HTN	2021-08-04	AZ	2021-11-07	AZ	N.A	N.A	fever and sore throat	2022-05-04	mild
306	2022-05-08	17	BA.2	38	F	x	?	?	?	?	?	unknown	itchyness of throat	2022-05-08	mild
307	2022-05-07	14	BA.2	81	F	IDC	?	?	?	?	?	?	cough	2022-05-07	moderate
308	2022-05-08	15	BA.2	55	F	HCV infection	?	?	?	?	?	?	cough and SOB	2022-05-06	moderate
309	2022-05-01	12	BA.2	89	M	CAD, HTN,	2021-06-15	AZ	x	x	N.A	N.A	vomit	2022-04-30	mild
310	2022-05-20	21	BA.2	78	F	HTN, T2DM	N.A	N.A	N.A	N.A	N.A	N.A	fever and cough	2022-05-15	severe
311	2022-05-14	19	BA.2	42	M	HF, HTN, T2DM	N.A	N.A	N.A	N.A	N.A	N.A	SOB and desaturation	2022-05-14	severe
312	2022-05-13	17	BA.2	59	F	T2DM, VHD, s/p heart transplantation	N.A	N.A	N.A	N.A	N.A	N.A	fever and SOB	2022-05-12	severe
313	2022-05-21	17	BA.2	30	F	SLE and thalassemia	?	BNT	?	BNT	2022-02-16	Moderna	sore throat and cough	2022-05-21	mild
314	2022-05-04	15	BA.2	83	M	T2DM, ESRD, CAD	?	moderna	?	moderna	N.A	N.A	SOB and general weakness	2022-05-01	mild
315	2022-04-30	14	BA.2	81	F	HTN	?	?	?	?	?	?	productive cough	2022-04-29	severe
316	2022-05-19	14	BA.2	81	M	basal cell carcinoma, HF, HTN	N.A	N.A	N.A	N.A	N.A	N.A	vomit, SOB	2022-05-18	moderate
317	2022-05-20	15	BA.2	70	M	T2DM, HTN, ESRD	?	?	?	?	?	moderna	cough	2022-05-19	mild
318	2022-05-17	11	BA.2	70	M	COPD, T2DM	N.A	N.A	N.A	N.A	N.A	N.A	SOB	2022-05-18	severe
319	2022-05-17	14	BA.2	45	M	NPC with metas	N.A	N.A	N.A	N.A	N.A	N.A	fever, chills productive cough and dyspnea	2022-05-16	moderate
320	2022-05-02	19	BA.2	62	M	T2DM, HTN	N.A	N.A	N.A	N.A	N.A	N.A	hypothermia and desaturation	2022-05-12	severe
321	2022-05-13	26	BA.2	70	F	HTN, dementia	?	?	?	?	2022-01-28	moderna	fever, sore throat and cough	2022-05-04	severe
322	2022-05-24	14	BA.2	5	M	x	N.A	N.A	N.A	N.A	N.A	N.A	fever and fatigue, seizure noted on 5/24	2022-05-23	severe
323	2022-05-19	13	BA.2	2	M	x	N.A	N.A	N.A	N.A	N.A	N.A	fever, runny nose	2022-05-19	moderate
324	2022-05-15	14	BA.2	89	M	CAD, CKD	N.A	N.A	N.A	N.A	N.A	N.A	fever, pneumonia	2022-05-15	severe
325	2022-05-19	28	BA.2	73	M	T2DM, HCVD	N.A	N.A	N.A	N.A	N.A	N.A	SOB	2022-05-17	severe
326	2022-05-14	29	BA.2	92	M	VHD	N.A	N.A	N.A	N.A	N.A	N.A	SOB,fever	2022-05-15	severe
327	2022-05-18	18	BA.2	44	M	DCM w HF	N.A	N.A	N.A	N.A	N.A	N.A	cough, SOB	2022-05-17	severe
328	2022-05-20	11	BA.2	66	M	T2DM, HTN, HBV	?	?	?	?	?	?	SOB, chillness	2022-05-19	severe
329	2022-05-09	9	BA.2	82	F	T2DM, HTN, CAD, pulmonary fibrosis	N.A	N.A	N.A	N.A	N.A	N.A	fever and progressed dyspnea	2022-05-05	severe
330	2022-05-09	21	BA.2	60	M	SQCC of esophagus, T2DM	?	?	?	?	?	?	SOB and pneumoia with desaturation		severe
331	2022-05-10	23	BA.2	4	F	x	N.A	N.A	N.A	N.A	N.A	N.A	fever	2022-05-10	severe
332	2022-05-13	10	BA.2	28	F	chronic respitatory failure	2021-06-18	AZ	2021-09-06	AZ	2022-01-25	moderna	fever and desaturation	2022-05-13	severe
333	2022-05-31	21	BA.2	17	M	Cerebral palsy	N.A	N.A	N.A	N.A	N.A	N.A	fever and desaturation	2022-05-30	severe
334	2022-05-22	14	BA.2	72	M	HTN, T2DM, CKD	?	?	?	?	?	?	fever	2022-05-20	severe
335	2022-05-27	27	BA.2	94	M	HTN, T2DM	2021-07-28	moderna	2021-10-25	moderna	2022-01-25	moderna	fever	2022-05-27	severe
336	2022-05-26	12	BA.2	73	F	HTN	?	?	?	?	?	N.A	cough	2022-05-26	mild
337	2022-05-24	13	BA.2	90	M	CAD, CKD	?	?	?	?	?	?	general weakness and fever since 5/24	2022-05-23	moderate
338	2022-05-25	21	BA.2	62	M	Hypopharyngeal SQCC,	N.A	N.A	N.A	N.A	N.A	N.A	general weakness and SOB	2022-05-25	severe
339	2022-05-26	21	BA.2	1	F	x	N.A	N.A	N.A	N.A	N.A	N.A	fever, runny nose, and cough, seizure noted in the afternoon	2022-05-26	severe
340	2022-05-23	18	BA.2	77	M	HTN, colon CA	?	?	?	?	?	?	SOB, desaturation	2022-05-23	severe
341	2022-05-26	14	BA.2	95	M	T2DM, HF	2021-06-01	moderna	2021-07-03	moderna	2022-01-10	moderna	fever, desaturation and acute respiratory distress	2022-05-24	severe
342	2022-05-22	17	BA.2	58	M	T2DM, CAD, HTN, ESRD w HD	?	?	?	?	?	?	cerebellum hemorrhage on 5/22, pneumonia 5/24	2022-05-24	moderate
343	2022-05-16	15	BA.2	90	M	CAD, HTN,	?	?	?	?	?	?	desaturation and collapse	2022-05-14	severe
344	2022-05-25	13	BA.2	46	F	schizo, IDA	?	?	?	?	?	?	SOB, desaturation	2022-05-27	moderate
345	2022-05-24	31	BA.2	63	M	old stroke	?	?	?	?	?	?	conscious change and desaturation, asystole	2022-05-23	severe
346	2022-05-14	13	BA.2	81	F	HTN, T2DM, old stroke, CAD	?	?	?	?	?	?	poor appetite, general weakness		severe
347	2022-05-08	17	BA.2	82	M	HTN, T2DM, ICH	?	?	?	?	?	N.A	fever	2022-05-08	mild
348	2022-06-01	14	BA.2	77	F	HTN, T2DM, parkison	?	?	?	?	?	?	fever, SOB, pneumonia	2022-05-26	severe
349	2022-06-05	15	BA.2	3	F	x	N.A	N.A	N.A	N.A	N.A	N.A	fever and seizure attack	2022-06-05	severe
350	2022-05-30	9	BA.2	91	M	duodenal ulcer with perforation	N.A	N.A	N.A	N.A	N.A	N.A	poor appetite, general weakness	2022-05-29	moderate
351	2022-06-06	14	BA.2	70	F	T2DM, HF, stroke, MVP, ESRD	2021-06-17	AZ	2021-09-09	AZ	2022-01-20	BNT	poor appetite, general weakness	2022-06-03	severe

## Sheet: Ab
No.	ct	Varinat	Disease course	IgM-N	IgM-RBD	IgM-S1	IgG-N	IgG-RBD	IgG-S1
1	32	O BA.1	2-3W	1.53	4.66	2.75	0.37	164.29	113.54
2	15	O BA.1	<1W	0.17	1.35	0.62	0.15	15.51	8.52
4	31	O BA.1	<1W	0.57	3.88	1.48	0.1	164.4	113.67
10	31	BA.2	>3W	3.34	14.42	5.87	2.6	163.24	114.49
12	15	O BA.1	1-2W	25.67	24.09	14.55	0.03	36.35	21.2
14	28	O BA.1	2-3W	1.97	15.63	5.04	3.75	162.44	115.31
15	16	O BA.1	1-2W	2.33	7.31	3.85	1.7	31.28	17.68
19	16	BA.2	<1W	0.29	1.69	0.75	0.13	165.01	113.66
20	19	O BA.1	<1W	0.09	1.19	0.28	0.79	11.94	6.73
21	17	O BA.1	<1W	0.53	5.44	2.29	0.09	44.76	39.26
25	12	O BA.1	1-2W	2.41	4.12	2.18	0.15	160.19	88.85
26	14	O BA.1	1-2W	1.01	4.67	1.31	0.06	46.79	32.72
27	12	O BA.1	<1W	0.35	2.42	0.48	0.09	151.6	88.7
29	34	O BA.1	>3W	3.19	29.08	11.76	4.95	163.73	114.01
30	14	O BA.1	<1W	0.24	1.59	0.65	0.6	10.26	4.67
31	17	O BA.1	1-2W	1.26	3.94	2.24	0.04	48.61	33.11
32	18	O BA.1	<1W	0.11	2.45	1	0.23	8.76	4.3
33	15	O BA.1	<1W	0.27	4.7	2.11	0.41	162.1	112.45
34	23	O BA.1	1-2w	0.57	7.63	2.38	0.32	162.03	111.66
38	18	O BA.1	1-2W	1.93	2.78	1.57	0.13	58.08	38.45
40	19	O BA.1	<1W	0.73	8.04	4.52	0.18	164.19	113.68
41	16	O BA.1	1-2W	1.56	1.49	1	0.4	36.29	22.39
43	14	O BA.1	<1W	0.71	4.59	2.14	0.26	0.35	0.34
44	26	O BA.1	2-3W	8.63	20.57	10.32	0.1	164.52	113.08
46	18	O BA.1	1-2W	2.77	16.78	5.46	0.08	124.09	77.65
47	30	O BA.1	2-3W	1.59	1.36	0.56	0.16	17.73	11.36
48	13	BA.2	<1W	0.72	2.6	1.09	0.07	161.8	107.35
49	20	O BA.1	2-3W	3.21	6.8	3.87	0.12	162.94	113.88
50	16	O BA.1	<1W	0.66	5.99	5.13	0.06	13.56	8.07
51	14	O BA.1	1-2W	1.23	8.44	24.73	0.04	43.93	27.82
53	18	O BA.1	<1W	0.11	0.27	0.34	0.04	29.31	18.09
55	19	O BA.1	<1W	0.72	3.11	1.75	0.17	58.74	31.51
56	25	BA.2	1-2w	0.47	1.89	0.85	0.22	165.88	114.96
59	33	O BA.1	>3W	1.1	2.42	0.55	3.45	164.99	114.83
61	18	O BA.1	<1W	0.75	8.04	2.34	0.14	114.68	38.93
63	14	BA.2	<1W	0.51	2.05	1.06	0.13	0.16	0.24
65	16	O BA.1	1-2W	16.57	2.43	1.73	0.13	57.36	76.63
66	17	O BA.1	1-2W	2.34	3.31	1.6	0.5	164.66	113.08
70	24	O BA.1	2-3W	1.81	5.29	2.41	4.33	165.96	114.7
72	18	BA.2	1-2W	1.12	4.45	1.89	0.07	162.33	107.04
78	20	O BA.1	2-3W	5.8	5.22	2.56	0.09	1.42	0.87
79	28	BA.2	2-3W	4.15	11.16	5.26	0.13	165.59	112.91
80	20	O BA.1	2-3W	1.22	19.14	5.37	0.12	163.7	113.84
83	13	BA.2	1-2W	1.03	10.13	3.06	0.07	164.6	111.72
84	30	O BA.1	>3W	219.82	7.48	2.81	1.32	164.45	114.09
87	14	O BA.1	<1W	0.58	3.88	1.68	0.33	150.71	91.82
88	29	O BA.1	2-3W	3.23	8.66	4.64	0.68	162.83	113.69
89	24	O BA.1	1-2w	0.82	3.97	2.14	0.06	165.97	113.13
92	22	BA.2	2-3W	1.36	12.28	5.47	0.33	163.58	112.91
93	25	O BA.1	2-3W	15.6	21.13	10.87	4.35	164.26	113.73
95	23	O BA.1	2-3W	3.45	6.59	4.81	0.07	40.34	24.31
96	14	O BA.1	1-2W	1.1	7.39	3.59	0.07	163.43	108.11
99	27	O BA.1	2-3W	3.76	18.14	8.56	0.13	165.14	114.14
101	14	O BA.1	1-2W	7	6.97	3.27	0.14	161.61	115.36
102	12	O BA.1	<1W	0.83	5.19	2.34	0.12	164.77	114.31
103	16	BA.2	<1W	0.45	3.6	2.08	0.1	163.86	113.92
105	13	O BA.1	<1W	0.34	77.75	22.49	0.09	164.3	114.72
106	25	O BA.1	1-2w	0.94	3.88	1.45	0.14	153.73	92.68
108	15	O BA.1	<1W	0.79	2.79	1.57	0.22	63.72	41.46
109	24	O BA.1	1-2w	0.31	3.87	1.83	0.24	163.17	113.27
110	13	O BA.1	<1W	0.67	1.14	0.56	0.08	162.97	113.26
111	30	O BA.1	2-3W	3.26	5.36	2.26	0.31	163.35	113.84
118	15	O BA.1	<1W	0.93	10.86	3.97	0.88	44.78	28.53
119	22	BA.2	2-3W	5.32	4.31	2.72	0.16	160.76	102.22
120	31	O BA.1	>3W	3.42	10.46	11.26	9.86	165.31	113.09
121	31	O BA.1	>3W	8.8	6.67	4.1	33.76	162.06	114.85
122	31	O BA.1	>3W	2.84	13.52	9.73	4.06	164.37	112.49
123	13	O BA.1	1-2W	1.28	4.3	2.25	0.15	163.18	114.4
125	16	BA.2	<1W	0.84	7.12	4.21	0.04	165.12	114.07
127	13	BA.2	<1W	0.96	9.14	4.73	0.07	164.77	113.48
128	22	O BA.1	2-3W	1.3	5.65	4.51	0.43	160.66	113.08
130	13	O BA.1	<1W	0.49	2.92	1.03	0.18	57.58	26.23
138	12	O BA.1	<1W	0.2	1.8	0.66	0.15	161.32	90.66
139	13	O BA.1	<1W	0.78	7	3.11	0.12	155.89	112.99
143	30	BA.2	>3W	2.93	6.51	1.48	46.48	162.16	113.87
146	18	BA.2	1-2W	6.68	3.73	2.5	0.18	8.91	4.12
147	15	O BA.1	1-2W	1.54	4.98	2.3	0.06	161.66	113.84
149	16	O BA.1	1-2W	12.07	16.24	8.76	0.05	29.39	15.39
150	23	O BA.1	2-3W	1.16	12.22	5.13	0.14	163.99	115.03
151	21	O BA.1	2-3W	3.43	8.7	3.73	0.05	163.04	113.57
152	16	O BA.1	1-2W	22.91	30.07	14.21	0.1	164.67	114.56
157	30	O BA.1	>3W	2.15	4.43	1.72	9.01	165.6	115.21
158	27	BA.2	2-3W	4.09	12.24	4.37	0.16	164.94	112.93
160	31	BA.2	>3W	0.6	3.14	1.35	2.55	164.42	113.66
164	19	BA.2	<1W	0.24	1.23	0.52	0.07	163.94	112.03
166	19	BA.2	1-2W	2.94	9.58	5.71	0.1	56.26	27.96
167	15	BA.2	<1W	0.81	4.18	1.76	0.17	165.35	114.27
168	17	BA.2	1-2W	2.23	21.23	10.3	0.25	163.4	113.48
169	13	BA.2	1-2W	6.66	14.33	8.29	1.29	5.96	3.2
172	18	BA.2	1-2W	9.8	8.02	4	0.41	165.37	113.61
173	12	BA.2	1-2W	1.79	4.28	2.62	0.08	74.96	36.95
174	15	BA.2	1-2W	1.93	5.77	4.02	0.07	163.1	106.68
175	17	BA.2	1-2W	1.31	7	3.5	5.72	162.81	112.38
176	15	BA.2	<1W	0.07	1.39	0.48	0.09	163.8	113.91
177	15	BA.2	<1W	0.35	5.29	1.81	0.1	134.67	89.64
178	14	BA.2	1-2W	1.93	6.5	3.78	0.16	40.94	23.2
179	14	BA.2	1-2W	1.07	3.12	2.92	2.11	165.33	113.28
180	14	BA.2	<1W	0.31	1.41	0.6	0.06	162.82	113.71
181	17	BA.2	1-2W	1.45	2.24	0.99	7.51	166.08	113.24
182	31	BA.2	>3W	1.01	7.48	3.26	4.01	164.2	113.58
183	16	BA.2	<1W	0.46	3.74	1.66	43	165.43	112.35
184	16	BA.2	<1W	0.05	34.4	14.98	0.04	158.83	93.2
185	12	BA.2	<1W	0.62	2.66	1.33	0.02	10.94	5.68
186	26	BA.2	2-3W	2.03	11.69	5.68	0.42	160.97	96.59
187	15	BA.2	<1W	0.25	0.96	0.4	0.09	146.9	81.54
188	16	BA.2	<1W	0.3	0.88	0.41	0.32	142.49	105.33
189	18	BA.2	<1W	0.62	4.02	2.11	0.23	162.09	111.76
190	16	BA.2	1-2W	5.53	18.06	8.1	0.13	158.67	91.12
191	18	BA.2	<1W	0.54	10.45	3.52	0.03	91.31	43.14
192	14	O BA.1	<1W	0.33	3.82	1.51	0.06	163.3	113.17
194	16	O BA.1	<1W	0.06	0.88	0.32	0.04	163.91	114.36
195	29	BA.2	2-3W	1.85	34.23	14.04	0.23	165.35	114.97
196	15	O BA.1	<1W	0.41	3.83	1.88	0.07	162.1	96.32
197	11	BA.2	<1W	0.68	2.2	0.97	0.08	164.26	113.22
199	15	O BA.1	1-2W	1.84	2.35	1.29	0.08	55.98	32.62
200	23	O BA.1	1-2w	0.29	4.78	2.12	0.05	166	114.35
201	21	O BA.1	1-2w	0.78	2.1	1.15	0.02	164.6	114.97
202	14	BA.2	1-2W	2.13	9.36	4.93	0.03	162.8	113.57
203	14	BA.2	1-2W	1.25	9.31	4.99	0.06	163.83	115.13
205	15	BA.2	<1W	0.71	28.62	9.85	0.25	165.05	114.61
206	21	BA.2	2-3W	1.28	7.62	3.01	0.22	163.9	113.92
207	13	BA.2	<1W	0.6	8.25	3.52	0.2	163.17	112.23
208	21	BA.2	1-2w	0.79	1.89	1.25	0.05	43.16	18.87
210	13	BA.2	<1W	0.3	2	0.95	0.06	38.66	23.99
211	15	BA.2	<1W	0.45	11.72	4.61	0.15	163.46	114.04
214	18	BA.2	<1W	0.84	4.32	1.36	0.13	163.69	113.79
215	21	BA.2	1-2w	0.49	0.87	0.62	0.08	5.98	11.13
216	14	BA.2	1-2W	1.2	1.26	0.68	0.1	163.95	113.93
218	14	BA.2	<1W	0.08	2.08	1.22	0.07	113.02	42.07
219	15	BA.2	1-2W	2.87	4.51	2.15	0.11	164.56	112.66
221	19	BA.2	<1W	0.55	3.01	1.16	0.05	0.28	0.28
222	24	BA.2	1-2w	0.18	1.15	0.51	0.27	164.96	112.71
223	16	BA.2	<1W	0.47	7.63	3.69	0.12	165.12	113.07
224	19	BA.2	<1W	0.21	1.64	1.13	0.08	165.19	113.57
225	21	O BA.1	1-2w	0.16	7.89	4.72	0.27	163.11	112.72
226	17	BA.2	<1W	0.3	4.27	2.19	0.11	157.33	87.38
227	29	BA.2	1-2w	0.32	12.66	5.96	0.11	166.12	113.01
228	17	BA.2	1-2W	2.26	8.26	4.21	0.46	132.36	116.42
229	27	BA.2	1-2w	0.75	4.2	2.27	0.04	0.01	0.13
230	16	BA.2	<1W	0.75	1.53	1.14	0.29	0.61	0.61
231	15	BA.2	1-2W	11.66	2.87	1.56	0.29	150.81	115.39
232	19	BA.2	1-2W	1.16	7.61	4.96	0.45	9.89	5.93
233	14	BA.2	<1W	0.13	2.01	0.72	0.2	161.84	115.5
234	23	BA.2	2-3W	5.23	7.56	3.94	0.05	0.02	0.38
235	32	BA.2	2-3W	2.46	7.64	4	0.03	161	113.44
236	15	BA.2	<1W	0.12	0.58	0.27	0.23	161.68	85.82
237	29	BA.2	2-3W	9.57	5.67	12.61
238	18	BA.2	<1W	0.31	2.31	0.71
239	19	BA.2	<1W	0.17	0.13	0.13
240	15	BA.2	1-2W	1.64	2.4	1.69
242	19	BA.2	<1W	0.27	3.53	1.52
243	19	BA.2	1-2W	7.22	8.54	6.61
244	14	BA.2	<1W	0.42	4.27	2.15
245	21	BA.2	1-2w	0.08	1.32	0.5
246	15	BA.2	<1W	0.38	1.33	0.5
247	31	BA.2	>3W	1.75	1.31	2.18	1.64	159.85	113.82
248	13	BA.2	1-2W	1.38	3.28	2.13
249	19	BA.2	1-2W	5.67	9.51	5.92
250	21	BA.2	1-2w	0.41	2.69	1.22
251	31	BA.2	<1W	0.37	1.26	0.45	0.01	18.64	9.95
252	14	BA.2	<1W	0.65	2.97	1.73
253	34	BA.2	<1W	0.44	2.91	1.21	0.04	27.48	13.44
254	15	BA.2	1-2W	1.56	6.78	4
255	17	BA.2	<1W	0.5	3.17	1.28
256	16	BA.2	<1W	0.05	1.36	0.54
257	23	BA.2	1-2w	0.22	2.79	1.49
258	14	BA.2	<1W	0.21	12.22	5.16
259	13	BA.2	<1W	0.67	9.46	3.41
260	16	BA.2	<1W	0.23	2.4	1.16
261	15	BA.2	<1W	0.28	3.5	1.36
264	16	BA.2	1-2W	1.65	10.03	5.54
265	18	BA.2	1-2W	1.66	4.67	2.11
266	12	BA.2	<1W	0.59	21.21	11.66
267	19	BA.2	<1W	0.08	1.94	0.79
268	16	BA.2	1-2W	1.1	4.45	2.03
269	33	BA.2	<1W	0.98	7.89	4.51	0.1	9.96	5.26
270	19	BA.2	<1W	0.31	0.52	0.22
271	24	BA.2	1-2w	0.2	1.16	0.45
272	19	BA.2	<1W	0.3	10.75	4.8
273	15	BA.2	1-2W	3.07	9.33	5.27
274	28	BA.2	2-3W	1.45	5.04	2.28
276	19	BA.2	1-2W	1.87	5.05	3.25
277	21	BA.2	2-3W	8.16	12.47	8.05
278	16	BA.2	1-2W	3.62	7.23	4.49
279	26	BA.2	1-2w	0.59	18.51	3.8	0.12	160.51	110.4
280	15	BA.2	<1W	0.55	3.51	2.42
281	16	BA.2	<1W	0.38	1.48	0.73
282	14	BA.2	<1W	0.35	2.11	0.89
283	25	BA.2	1-2w	0.52	1.03	0.52
284	17	BA.2	<1W	0.53	4.53	2.04
285	12	BA.2	<1W	0.24	1.12	0.71
286	34	BA.2	<1W	0.34	5.91	2.65
287	22	BA.2	1-2w	0.55	20.19	6.09
288	14	BA.2	1-2W	1.74	5.09	2.59
289	22	BA.2	1-2w	0.39	2.68	1.27
290	22	BA.2	2-3W	1.07	4.66	2.89
291	21	BA.2	1-2w	0.17	2.46	1.36
292	11	BA.2	<1W	0.22	19.02	4.76
293	26	BA.2	1-2w	0.09	0.58	0.23
294	12	BA.2	1-2W	2.69	6.13	3.51
295	14	BA.2	<1W	0.18	1.84	1.14
296	22	BA.2	1-2w	0.82	3.7	2
297	13	BA.2	<1W	0.11	2.22	1.17
298	26	BA.2	1-2w	0.12	3.5	1.67
299	12	BA.2	<1W	0.05	3.16	1.33
300	19	BA.2	1-2W	1.39	10.99	5.72
301	16	BA.2	<1W	0.69	1.75	0.95
302	13	BA.2	1-2W	1.01	3.77	2.33
303	19	BA.2	1-2W	3.47	9.45	5.21
304	22	BA.2	1-2w	0.27	1.56	0.83
305	17	BA.2	<1W	0.71	3.21	1.68
306	17	BA.2	1-2W	2.28	10.75	5.4
307	14	BA.2	<1W	0.31	2.92	1.74
308	15	BA.2	1-2W	1.71	2.32	1.2	0.17	0.2	0.18
309	12	BA.2	<1W	0.1	1.11	0.76
310	21	BA.2	1-2w	0.1	2.46	1.26	0.19	0.11	0.07
311	19	BA.2	<1W	0.94	0.86	0.42	0.48	0.1	0.08
312	17	BA.2	1-2W	5.75	3.31	2.16
313	17	BA.2	1-2W	1.99	13.56	5.14
314	15	BA.2	1-2W	1.55	6.43	3.09	0.04	2.52	1.17
315	14	BA.2	<1W	0.6	2.48	1.5	0.05	0.08	0.06
316	14	BA.2	<1W	0.12	2.29	1.16
317	15	BA.2	<1W	0.16	1.08	0.51
318	11	BA.2	<1W	0.19	0.5	0.45	0.05	0.36	0.25
319	14	BA.2	<1W	0.22	1.33	0.8	0.06	0.2	0.15
320	19	BA.2	1-2W	14.41	2.06	1.02	0.84	0.93	0.42
321	15	BA.2	<1W	0.53	3.3	1.45	0.17	120.55	91.19
322	14	BA.2	1-2W	1.31	5.33	2.89	0.42	14.99	8.58
323	13	BA.2	1-2W	1.42	2.35	1.52
324	14	BA.2	<1W	0.04	2.01	1.27	0.08	13.05	5.17
325	28	BA.2	1-2w	0.99	2.96	1.35
326	15	BA.2	1-2W	1.54	2.34	0.87
327	18	BA.2	<1W	0.78	6.88	3.61
328	11	BA.2	<1W	0.07	0.25	0.06
329	9	BA.2	1-2W	7.95	2.24	1.37	0.09	0.53	0.44
330	17	BA.2	<1W	0.08	1.94	0.27	0.05	0.19	0.15
331	23	BA.2	2-3W	1.15	12.44	6.49	1.19	111.57	39.59
332	10	BA.2	<1W	0.42	17.58	5.21
333	21	BA.2	1-2w	0.59	8.21	4.41	0.03	5.17	2.47
334	14	BA.2	<1W	0.57	2.23	0.96
335	27	BA.2	1-2w	0.12	4.38	1.96	0.17	161.04	111.7
336	12	BA.2	<1W	0.82	8.75	4.65
337	13	BA.2	<1W	0.44	3.84	1.85
338	21	BA.2	1-2w	0.91	0.5	0.25
339	21	BA.2	1-2w	0.63	8.23	4.75	0.01	0.1	0.03
340	18	BA.2	<1W	0.67	4	2.21	0.23	2.19	1.79
341	14	BA.2	<1W	0.67	4	2.21	0.23	2.19	1.79
342	17	BA.2	<1W	0.27	1.31	0.71	0.31	161	110.27
343	14	BA.2	<1W	0.16	23.78	9.28	0.27	158.38	111.33
344	13	BA.2	<1W	0.2	1.19	0.64	0.04	0.4	0.08
345	31	BA.2	>3W	6.34	5.27	1.66	10.55	0.9	0.28
346	25	BA.2	2-3W	4.17	1.57	1.03
347	17	BA.2	<1W	0.64	2.13	1.04	1.8	44.24	18.1
348	14	BA.2	<1W	0.72	8.69	3.6	0.48	0.82	0.39
349	15	BA.2	<1W	0.75	5.59	2.69	0.05	0.64	0.26
350	9	BA.2	<1W	0.3	1.44	0.64	0.06	39.27	19.21
351	14	BA.2	<1W	0.63	2.67	1.17	0.26	157.52	108.2

## Sheet: Ct
No.	ct	Disease course	1st date	2nd date	period	Ct	3rd date	period	Ct	4th date	period	Ct	5th date	period	Ct	6th date	period	Ct
1	32	2-3W	2022-02-07	2022-02-18	11	neg	2022-02-19	12	neg
2	15	<1W	2022-02-03	2022-02-13	10	32	2022-02-14	11	33
4	31	<1W	2022-02-07	2022-02-10	3	35	2022-02-17	10	Neg
10	31	>3W	2022-02-03	2022-02-07	4	30	2022-02-09	6	34
12	15	1-2W	2022-02-12	2022-02-22	10	30	2022-02-23	11	30
14	28	2-3W	2022-02-09	2022-02-18	9	31	2022-02-19	10	neg
15	16	1-2W	2022-02-09	2022-02-18	9	33	2022-02-19	10	33
19	16	<1W	2022-02-07	2022-02-16	9	31	2022-02-17	10	30
20	19	<1W	2022-02-04	2022-02-13	9	33
21	17	<1W	2022-02-08	2022-02-19	11	23	2022-02-22	14	32
25	12	1-2W	2021-12-29	2022-01-10	12	neg
26	14	1-2W	2022-01-02	2022-01-11	9	26	2022-01-13	11	30
27	12	<1W	2022-01-02	2022-01-11	9	30	2022-01-13	11	33
29	34	>3W	2021-12-29	2022-01-07	9	31
30	14	<1W	2022-01-02	2022-01-07	5	31
31	17	1-2W	2021-12-20	2021-12-29	9	27	2022-01-02	13	31
32	18	<1W	2021-12-24	2022-01-03	10	28	2022-01-04	11	33
33	15	<1W	2022-01-04	2022-01-11	7	29	2022-01-14	10	31
34	23	1-2w	2022-01-03	2022-01-12	9	25	2022-01-15	12	28	2022-01-18	15	34
38	18	1-2W	2021-12-26	2022-01-04	9	26	2022-01-06	11	32
40	19	<1W	2021-12-31	2022-01-09	9	25	2022-01-11	11	31
41	16	1-2W	2021-12-20	2021-12-29	9	33
43	14	<1W	2022-01-01	2022-01-10	9	26	2022-01-13	12	29	2022-01-19	18	32
44	26	2-3W	2021-12-28	2022-01-06	9	33	2022-01-07	10	30
46	18	1-2W	2021-12-18	2021-12-28	10	32	2021-12-29	11	31
47	30	2-3W	2021-12-19	2021-12-28	9	29	2021-12-29	10	31	2021-12-31	12	30
48	13	<1W	2022-01-04	2022-01-13	9	25	2022-01-16	12	30
49	20	2-3W	2021-12-24	2022-01-02	9	25	2022-01-04	11	24	2022-01-06	13	32
50	16	<1W	2021-12-28	2022-01-06	9	23	2022-01-08	11	26
51	14	1-2W	2021-12-20	2022-01-01	12	26	2022-01-03	14	30	2022-01-04	15	32
53	18	<1W	2021-12-31	2022-01-09	9	25	2022-01-12	12	31
55	19	<1W	2022-01-26	2022-02-04	9	33
56	25	1-2w	2022-01-15	2022-01-24	9	31	2022-01-25	10	29	2022-01-28	13	34
59	33	>3W	2022-01-28	2022-02-01	4	neg
61	18	<1W	2022-01-17	2022-01-26	9	32
63	14	<1W	2022-01-27	2022-02-07	11	21	2022-02-10	14	22	2022-02-16	20	32
65	16	1-2W	2022-01-27	2022-02-06	10	26	2022-02-09	13	31
66	17	1-2W	2022-01-11	2022-01-27	16	32
70	24	2-3W	2022-01-22	2022-01-25	3	25	2022-01-31	9	neg
72	18	1-2W	2022-01-21	2022-01-25	4	25	2022-01-31	10	Neg
78	20	2-3W	2022-01-21	2022-01-30	9	32	2022-01-31	10	31
79	28	2-3W	2022-01-21	2022-02-01	11	25	2022-02-02	12	31
80	20	2-3W	2022-01-25	2022-02-04	10	24	2022-02-07	13	32
83	13	1-2W	2022-01-21	2022-01-30	9	23	2022-02-01	11	33
84	30	>3W	2022-01-28	2022-02-01	4	33
87	14	<1W	2022-01-07	2022-01-16	9	29	2022-01-18		28	2022-01-20		31
88	29	2-3W	2022-01-13	2022-01-22	9	27	2022-01-25	12	29	2022-01-27	14	neg
89	24	1-2w	2022-01-13	2022-01-22	9	29	2022-01-25	12	neg
92	22	2-3W	2022-01-10	2022-01-19	9	33	2022-01-20	10	neg
93	25	2-3W	2022-01-14	2022-01-16	2	30	2022-01-18	4	neg
95	23	2-3W	2022-01-11	2022-01-20	9	25	2022-01-22	11	neg
96	14	1-2W	2022-01-06	2022-01-14	8	28	2022-01-16	10	31
99	27	2-3W	2022-01-06	2022-01-14	8	30	2022-01-15	9	neg
101	14	1-2W	2022-01-09	2022-01-17	8	25	2022-01-19	10	29	2022-01-21	12	33
102	12	<1W	2022-01-10	2022-01-19	9	22	2022-01-22	12	20	2022-01-25	15	30
103	16	<1W	2022-01-13	2022-01-22	9	18	2022-01-25	12	31
105	13	<1W	2022-01-10	2022-01-19	9	28	2022-01-23	13	34
106	25	1-2w	2022-01-05	2022-01-13	8	neg
108	15	<1W	2022-01-05	2022-01-13	8	25	2022-01-16	11	29	2022-01-20	15	30
109	24	1-2w	2022-01-05	2022-01-13	8	30	2022-01-14	9	28	2022-01-16	11	32
110	13	<1W	2022-01-06	2022-01-14	8	19	2022-01-17	11	33
111	30	2-3W	2022-01-05	2022-01-14	9	33	2022-01-15	10	neg
118	15	<1W	2022-02-12	2022-02-22	10	32
119	22	2-3W	2022-02-16	2022-02-25	9	30	2022-02-26	10	28	2022-02-28	12	30
120	31	>3W	2022-02-18	2022-02-22	4	34
121	31	>3W	2022-02-20	2022-02-23	3	neg
122	31	>3W	2022-02-18	2022-02-22	4	neg
123	13	1-2W	2022-02-18	2022-02-27	9	23	2022-03-02	12	31
125	16	<1W	2022-02-19	2022-03-01	10	34
127	13	<1W	2022-02-19	2022-02-28	9	31
128	22	2-3W	2022-02-20	2022-03-02	10	34	2022-03-03	11	neg
130	13	<1W	2022-02-18	2022-02-27	9	25	2022-03-02	12	35
138	12	<1W	2022-02-21	2022-03-02	9	30
139	13	<1W	2022-02-20	2022-03-01	9	25	2022-03-04	12	neg
143	30	>3W	2022-02-24	2022-02-26	2	30
146	18	1-2W	2022-02-27	2022-03-09	10	33
147	15	1-2W	2022-02-27	2022-03-09	10	30	2022-03-12	13	35
149	16	1-2W	2022-03-03	2022-03-13	10	35
150	23	2-3W	2022-03-03	2022-03-13	10	26	2022-03-16	13	32	2022-03-17	14	neg
151	21	2-3W	2022-03-03	2022-03-13	10	neg	2022-03-14	11	neg
152	16	1-2W	2022-03-03	2022-03-13	10	23	2022-03-18	15	29	2022-03-20	17	33
157	30	>3W	2022-03-01	2022-03-11	10	neg	2022-03-12	11	neg
158	27	2-3W	2022-03-02	2022-03-12	10	neg	2022-03-13	11	neg
160	31	>3W	2022-03-02	2022-03-05	3	32
164	19	<1W	2022-03-10	2022-03-20	10	34	2022-03-21	11	35
166	19	1-2W	2022-03-11	2022-03-21	10	27	2022-03-24	13	33
167	15	<1W	2022-03-11	2022-03-21	10	31	2022-03-22	11	34
168	17	1-2W	2022-03-13	2022-03-25	12	neg
169	13	1-2W	2022-03-06	2022-03-17	11	35
172	18	1-2W	2022-03-13	2022-03-20	7	35
173	12	1-2W	2022-03-21	2022-03-31	10	33
174	15	1-2W	2022-03-16	2022-03-25	9	30
175	17	1-2W	2022-03-16	2022-03-26	10	Neg
176	15	<1W	2022-03-19	2022-03-29	10	23	2022-04-02	14	neg
177	15	<1W	2022-03-21	2022-03-31	10	31	2022-04-01	11	32
178	14	1-2W	2022-03-15	2022-03-25	10	21	2022-03-31	16	32
179	14	1-2W	2022-03-25	2022-04-04	10	34	2022-04-05	11	32
180	14	<1W	2022-03-24	2022-04-03	10	31	2022-04-04	11	31
181	17	1-2W	2022-03-23	2022-04-02	10	35	2022-04-03	11	Neg
182	31	>3W	2022-03-23	2022-04-01	9	Neg	2022-04-02	10	33
183	16	<1W	2022-03-27	2022-04-06	10	31	2022-04-07	11	33
184	16	<1W	2022-03-27	2022-04-06	10	32	2022-04-07	11	35
185	12	<1W	2022-03-27	2022-04-06	10	17	2022-04-09	13	32	2022-04-10	14	Neg
186	26	2-3W	2022-03-27	2022-04-06	10	33	2022-04-07	11	34
187	15	<1W	2022-03-26	2022-04-05	10	34	2022-04-06	11	31
188	16	<1W	2022-03-26	2022-04-05	10	32	2022-04-06	11	34
189	18	<1W	2022-03-29	2022-04-07	9	24	2022-04-10	12	26	2022-04-13	15	29	2022-04-15	17	28	2022-04-16	18	neg
190	16	1-2W	2022-03-31	2022-04-07	7	25	2022-04-10	10	33	2022-04-11	11	33
191	18	<1W	2022-03-31	2022-04-07	7	26	2022-04-10	10	Neg	2022-04-11	11	36
192	14	<1W	2022-04-05	2022-04-10	5	25	2022-04-13	8	29	2022-04-16	11	33	2022-04-17	12	31
194	16	<1W	2022-04-05	2022-04-13	8	22	2022-04-16	11	26	2022-04-19	14	33	Remdesivir: 4/6-8
195	29	2-3W	2022-04-02	2022-04-06	4	34	2022-04-07	5	34
196	15	<1W	2022-04-02	2022-04-12	10	35	2022-04-15	13	Neg
197	11	<1W	2022-04-01	2022-04-07	6	24	2022-04-10	9	29	2022-04-12	11	32	2022-04-13	12	34
199	15	1-2W	2022-04-04	2022-04-11	7	29	2022-04-13	9	31	2022-04-14	10	33
200	23	1-2w	2022-04-03	2022-04-08	5	28	2022-04-11	8	29	2022-04-13	10	Neg	2022-04-14	11	Neg
201	21	1-2w	2022-04-03	2022-04-08	5	29	2022-04-11	8	33	2022-04-14	11	Neg
202	14	1-2W	2022-04-04	2022-04-08	4	27	2022-04-14	10	35	2022-04-15	11	34
203	14	1-2W	2022-04-05	2022-04-11	6	19	2022-04-14	9	23	2022-04-18	13	34	2022-04-19	14	27
205	15	<1W	2022-04-06	2022-04-13	7	33	2022-04-14	8	34
206	21	2-3W	2022-04-06	2022-04-13	7	31	2022-04-14	8	32				Remdesivir: 4/7-9
207	13	<1W	2022-04-03	2022-04-08	5	19	2022-04-12	9	34	2022-04-13	10	32
208	21	1-2w	2022-04-01	2022-04-09	8	26	2022-04-12	11	29	2022-04-15	14	28	2022-04-19	18	34
210	13	<1W	2022-04-04	2022-04-09	5	21	2022-04-12	8	25	2022-04-15	11	32	2022-04-16	12	26	2022-04-17	13	35
211	15	<1W	2022-04-06	2022-04-11	5	19	2022-04-15	9	32	2022-04-16	10	27	2022-04-19	13	33
214	18	<1W	2022-04-05	2022-04-13	8	24	2022-04-16	11	35	2022-04-17	12	34	Remdesivir: 4/6-10
215	21	1-2w	2022-04-06	2022-04-11	5	18	2022-04-14	8	29	2022-04-17	11	31	2022-04-18	12	33	4/19MBD
216	14	1-2W	2022-04-07	2022-04-21	14	Neg	2022-04-25	18	MBD
218	14	<1W	2022-04-07	2022-04-13	6	27	2022-04-20	13	31
219	15	1-2W	2022-04-08	2022-04-18	10	32	2022-04-19	11	32
221	19	<1W	2022-04-12	2022-04-20	8	21	4/23 MBD
222	24	1-2w	2022-04-08	2022-04-16	8	27	2022-04-19	11	32
223	16	<1W	2022-04-09	2022-04-16	7	28	2022-04-19	10	Neg
224	19	<1W	2022-04-08	2022-04-15	7	23	2022-04-19	11	32	4/20MBD
225	21	1-2w	2022-04-08	2022-04-15	7	33	2022-04-16	8	34
226	17	<1W	2022-04-08	2022-04-15	7	23	2022-04-19	11	33
227	29	1-2w	2022-04-08	4/21MBD
228	17	1-2W	2022-04-07	2022-04-13	6	16	2022-04-19	12	33
229	27	1-2w	2022-04-07	2022-04-11	4	31	2022-04-21	14	Neg	4/25MBD
230	16	<1W	2022-04-12	2022-04-17	5	21	2022-04-20	8	28	2022-04-22	10	34
231	15	1-2W	2022-04-13	2022-04-22	9	26	4/24MBD
232	19	1-2W	2022-04-13	2022-04-15	2	16	2022-04-20	7	28	2022-04-22	9	34
233	14	<1W	2022-04-13	2022-04-22	9	31	2022-04-24	11	MBD
234	23	2-3W	2022-04-08	2022-04-18	10	28	2022-04-21	13	Neg
235	32	2-3W	2022-04-18	2022-04-24	6	23	2022-04-26	8	21	4/29MBD
236	15	<1W	2022-04-18	2022-04-25	7	25	2022-04-29	11	Neg
237	35	2-3W	2022-04-16	2022-04-26	10	Neg	2022-04-27	11	MBD
238	18	<1W	2022-04-16	2022-04-22	6	22	2022-04-27	11	MBD
239	19	<1W	2022-04-17	2022-04-25	8	25	2022-04-27	10	32
240	15	1-2W	2022-04-16	2022-04-22	6	30	2022-04-26	10	MBD	Remdesivir: 4/17-19
242	19	<1W	2022-04-15	2022-04-22	7	33
243	19	1-2W	2022-04-14	2022-04-20	6	33
244	14	<1W	2022-04-15	2022-04-20	5	22	2022-04-26	11	MBD
245	21	1-2w	2022-04-19	2022-04-30	11	MBD
246	15	<1W	2022-04-19	2022-04-27	8	Neg	4/30MBD
247	31	>3W	2022-04-21	2022-04-26	5	Neg	4/27MBD
248	13	1-2W	2022-04-24	2022-05-02	8	26	5/5MBD
249	19	1-2W	2022-04-17	2022-04-25	8	MBD
250	21	1-2w	2022-04-25	2022-05-05	10	35	2022-05-10	15	32
251	31	<1W	2022-04-24	2022-04-29	5	15	2022-05-09	15	25	2022-05-14	20	13	2022-05-19	25	24	2022-05-22	28	neg	2022-05-23	29	33
252	14	<1W	2022-04-25	2022-05-02	7	25	2022-05-05	10	34	5/8MBD
253	34	<1W	2022-04-23	2022-05-01	8	26	2022-05-03	10	MBD
254	15	1-2W	2022-04-22	2022-05-01	9	19	2022-05-03	11	MBD
255	17	<1W	2022-04-24	2022-05-04	10	26	2022-05-07	13	33	5/8MBD
256	16	<1W	2022-04-24	2022-05-04	10	23	2022-05-07	13	MBD
257	23	1-2w	2022-04-24	2022-05-02	8	26	2022-05-06	12	MBD
258	14	<1W	2022-04-24	2022-05-05	11	MBD
259	13	<1W	2022-04-24	2022-05-05	11	MBD
260	16	<1W	2022-04-25	2022-05-04	9	MBD
261	15	<1W	2022-04-23	2022-04-28	5	19	2022-05-01	8	27	5/4MBD
264	16	1-2W	2022-04-23	2022-04-30	7	Expired		-44674
265	18	1-2W	2022-04-23	2022-05-02	9	34	2022-05-03	10	MBD
266	12	<1W	2022-04-25	2022-05-02	7	26	2022-05-07	12	MBD
267	19	<1W	2022-04-21	2022-05-01	10	32	2022-05-02	11	32	5/10MBD
268	16	1-2W	2022-04-22	2022-04-29	7	19	2022-05-05	13	Neg	5/3MBD
269	33	<1W	2022-04-24	2022-04-27	3	neg		-44675
270	19	<1W	2022-04-25	2022-05-05	10	18	2022-05-09	14	24	5/10MBD
271	24	1-2w	2022-04-23	2022-04-30	7	13	2022-05-07	14	MBD	Remdesivir: 4/24-26
272	19	<1W	2022-04-23	2022-04-30	7	21	2022-05-07	14	MBD	Remdesivir: 4/24-26
273	15	1-2W	2022-04-23	2022-04-30	7	25	2022-05-05	12	neg
274	28	2-3W	2022-04-25	2022-05-01	6	18	2022-05-04	9	34	5/5MBD
276	19	1-2W	2022-04-20	2022-04-28	8	24	2022-05-01	11	33
277	21	2-3W	2022-04-22	2022-05-02	10	26	2022-05-05	13	34
278	16	1-2W	2022-04-24	2022-05-01	7	18	2022-05-05	11	32
279	26	1-2w	2022-04-21	2022-04-22	1	19	2022-04-30	9	13	5/4MBD
280	15	<1W	2022-04-22	2022-04-30	8	30	2022-05-04	12	MBD
281	16	<1W	2022-04-22	2022-05-03	11	33
282	14	<1W	2022-04-23	2022-04-30	7	21	2022-05-04	11	MBD	5/4MBD
283	25	1-2w	2022-04-25	2022-04-30	5	25	2022-05-03	8	21	5/6MBD
284	17	<1W	2022-04-23	2022-04-30	7	26	2022-05-03	10	MBD
285	12	<1W	2022-04-28	2022-05-09	11	MBD
286	34	<1W	2022-04-28	2022-05-09	11	MBD
287	22	1-2w	2022-04-26	2022-05-01	5	17	2022-05-07	11	25	2022-05-10	14	33	5/11MBD
288	14	1-2W	2022-04-30	2022-05-11	11	MBD
289	22	1-2w	2022-04-27	2022-05-07	10	16	5/8MBD
290	22	2-3W	2022-05-02	2022-05-09	7	25	5/13MBD
291	21	1-2w	2022-05-02	2022-05-13	11	MBD
292	11	<1W	2022-05-01	2022-05-13	12	32	2022-05-14	13	32	5/16轉出
293	26	1-2w	2022-04-30	2022-05-06	6	23	2022-05-13	13	MBD
294	12	1-2W	2022-04-30	2022-05-11	11	MBD
295	14	<1W	2022-05-02	2022-05-13	11	MBD
296	22	1-2w	2022-05-04	2022-05-15	11	MBD
297	13	<1W	2022-05-04	2022-05-15	11	19
298	26	1-2w	2022-05-03	2022-05-13	10	18	2022-05-24	21	16	2022-05-30	27	36	6/4MBD
299	12	<1W	2022-05-05	2022-05-16	11	24
300	19	1-2W	2022-05-02	2022-05-11	9	21	2022-05-16	14	Neg	5/13MBD
301	16	<1W	2022-05-02	2022-05-11	9	21	2022-05-13	11	MBD
302	13	1-2W	2022-05-04	2022-05-11	7	Expired
303	19	1-2W	2022-05-04	2022-05-13	9	Neg
304	22	1-2w	2022-05-04	2022-05-13	9	28	2022-05-14	10	34
305	17	<1W	2022-05-04	2022-05-10	6	25	2022-05-13	9	29	2022-05-14	10	26	5/15MBD
306	17	1-2W	2022-05-08	2022-05-16	8	MBD
307	14	<1W	2022-05-07	2022-05-16	9	MBD
308	15	1-2W	2022-05-08	2022-05-16	8	26	2022-05-20	12	24	2022-05-25	17	19	5/26MBD
309	12	<1W	2022-05-01	2022-05-13	12	MBD
310	21	1-2w	2022-05-20	2022-05-28	8	23	2022-05-31	11	20	2022-06-07	18	29
311	19	<1W	2022-05-14	2022-05-20	6	18	2022-05-25	11	16	2022-05-28	14	23	2022-05-31	17	21	2022-06-03	20	22	2022-06-06	23	neg
312	17	1-2W	2022-05-13	2022-05-20	7	16	2022-05-23	10	Expired
313	17	1-2W	2022-05-21	2022-05-24	3	MBD
314	15	1-2W	2022-05-04	2022-05-14	10	22	2022-05-17	13	22	2022-05-23	19	28	2022-05-26	22	34	2022-05-27	23	35	5/28MBD
315	14	<1W	2022-04-30	2022-05-09	9	35	2022-05-10	10	29	2022-05-13	13	25	2022-05-16	16	24	2022-05-19	19	28	2022-05-23	23	Neg	6/7MBD
316	14	<1W	2022-05-19	2022-05-24	5	17	2022-05-27	8	21	6/1MBD
317	15	<1W	2022-05-20	2022-05-25	5	25	2022-05-28	8	27	2022-06-02	13	16	2022-06-05	16	neg
318	11	<1W	2022-05-17	2022-05-22	5	Neg
319	14	<1W	2022-05-17	2022-05-22	5	25	2022-05-28	11	27	2022-05-30	13	17	2022-06-03	17	25	2022-06-06	20	34
320	19	1-2W	2022-05-02	2022-05-13	11	21	2022-05-18	16	19	2022-05-22	20	19	2022-05-30	28	25	2022-06-02	31	28
321	?	<1W	2022-05-04	2022-05-13	9	26	2022-05-17	13	16	2022-05-24	20	33	2022-05-26	22	Neg
322	14	1-2W	2022-05-24	2022-05-27	3	17	2022-05-29	5	17	5/30MBD
323	13	1-2W	2022-05-19	2022-05-23	4	17	5/24MBD
324	14	<1W	2022-05-15	2022-05-23	8	13	2022-05-30	15	31
325	28	1-2w	2022-05-19	2022-06-04	16	Neg
326	29	1-2W	2022-05-14	2022-05-25	11	17	2022-06-04	21	33
327	18	<1W	2022-05-18	2022-05-24	6	17	2022-05-30	12	18	6/1MBD
328	11	<1W	2022-05-20	2022-06-01	12	21	2022-06-08	19	28
329	9	1-2W	2022-05-09	2022-05-19	10	19	2022-05-26	17	24	2022-05-31	22	19	6/2expired
330	21	<1W	2022-05-09	2022-05-10	1	17	2022-05-18	9	14	2022-05-27	18	17	2022-06-06	28	neg
331	23	2-3W	2022-05-10	2022-05-13	3	29	2022-05-18	8	19	5/20 Expired
332	10	<1W	2022-05-13	2022-05-24	11	17	2022-06-06	24	29
333	21	1-2w	2022-05-31	2022-06-05	5	neg	6/8MBD
334	14	<1W	2022-05-22	2022-05-27	5	15	2022-06-04	13	21	2022-06-10	19	22
335	27	1-2w	2022-05-27	2022-06-06	10	21
336	12	<1W	2022-05-26	2022-06-03	8	34	6/3MBD
337	13	<1W	2022-05-24	2022-05-29	5	15	2022-06-03	10	19	6/3MBD
338	30	1-2w	2022-05-25	2022-06-01	7	16	2022-06-07	13	21	6/14expired
339	21	1-2w	2022-05-26	2022-05-31	5	15	6/4MBD
340	18	<1W	2022-05-23	2022-06-06	14	33
341	14	<1W	2022-05-26	2022-06-04	9	15	6/6 expired
342	17	<1W	2022-05-22	2022-05-29	7	21	2022-06-07	16	29	6/13MBD
343	15	<1W	2022-05-16	2022-05-23	7	14	2022-05-30	14	34
344	13	<1W	2022-05-25	2022-06-01	7	33	6/6MBD
345	31	>3W	2022-05-24	2022-05-27	3	34
346	13	2-3W	2022-05-14	2022-05-19	5	25	2022-05-27	13	33	6/2MBD
347	17	<1W	2022-05-08	2022-05-13	5	27	2022-05-16	8	17	2022-05-19	11	17	2022-05-23	15	19	2022-05-27	19	neg
348	14	<1W	2022-06-01	2022-06-08	7	22
349	15	<1W	2022-06-05	2022-06-08	3	16	6/8MBD
350	9	<1W	2022-05-30	2022-06-06	7	14	2022-06-13	14	14
